# Supplementary material
Source: PubMed Central journal article supplement (PMC1559755)

**A****PAHX-AP1-luc**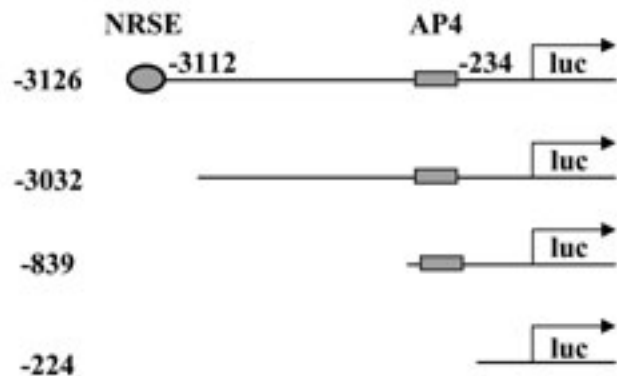**B**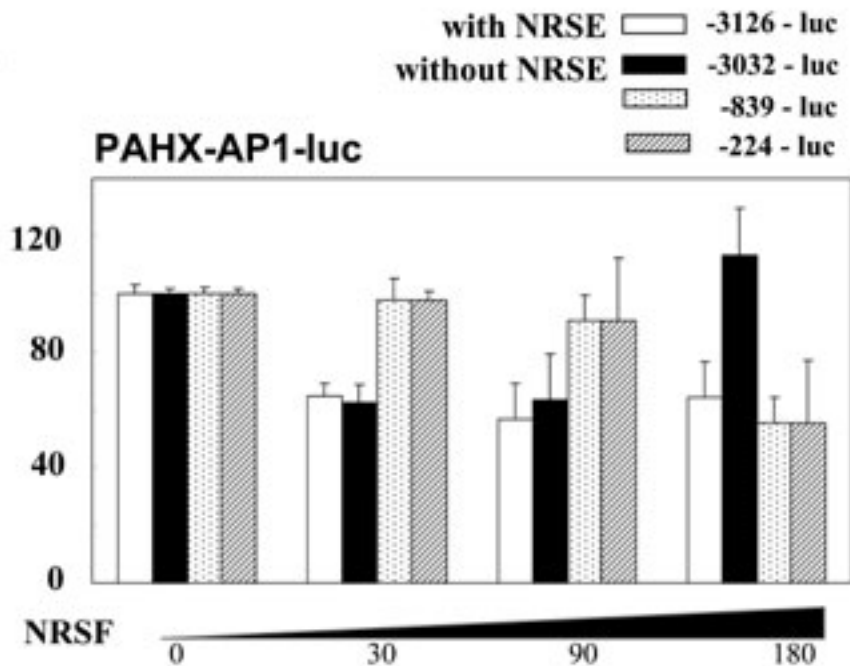

Supplement: pnas_0601915103_1.pdf [file pnas_0601915103_1.pdf]

**Antibody**  
**Competitor**  
**NE**  
**Probe**

|          |          |          |          |          |          |                 |                 |            |
|----------|----------|----------|----------|----------|----------|-----------------|-----------------|------------|
| -        | -        | -        | -        | -        | -        | <i>Anti-Gem</i> | <i>Anti-AP4</i> | <i>IgG</i> |
| -        | -        | ×1       | ×2       | ×5       | ×20      | -               | -               | -          |
| -        | +        | +        | +        | +        | +        | +               | +               | +          |
| <hr/>    |          |          |          |          |          |                 |                 |            |
| <b>1</b> | <b>2</b> | <b>3</b> | <b>4</b> | <b>5</b> | <b>6</b> | <b>7</b>        | <b>8</b>        | <b>9</b>   |

... →  
 ... →

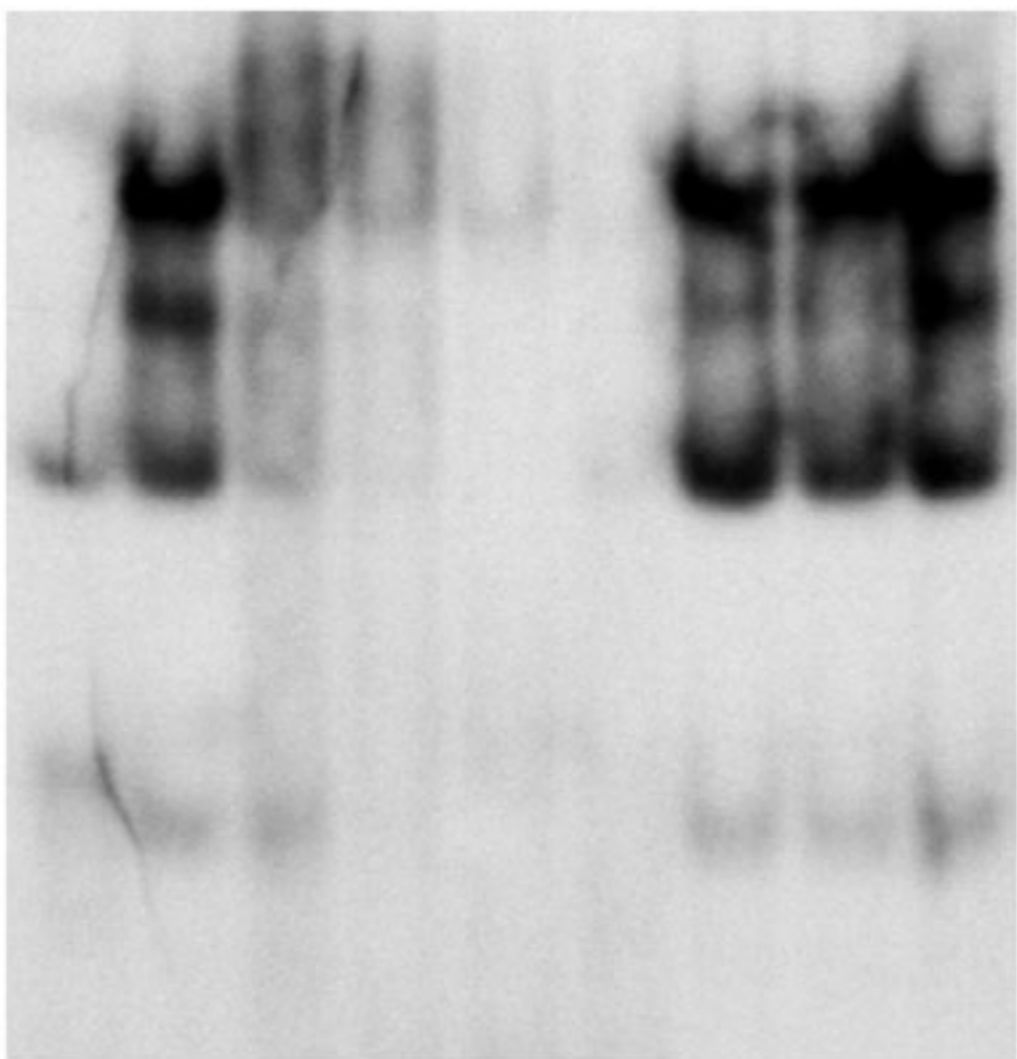

→

Supplement: pnas_0601915103_2.pdf [file pnas_0601915103_2.pdf]

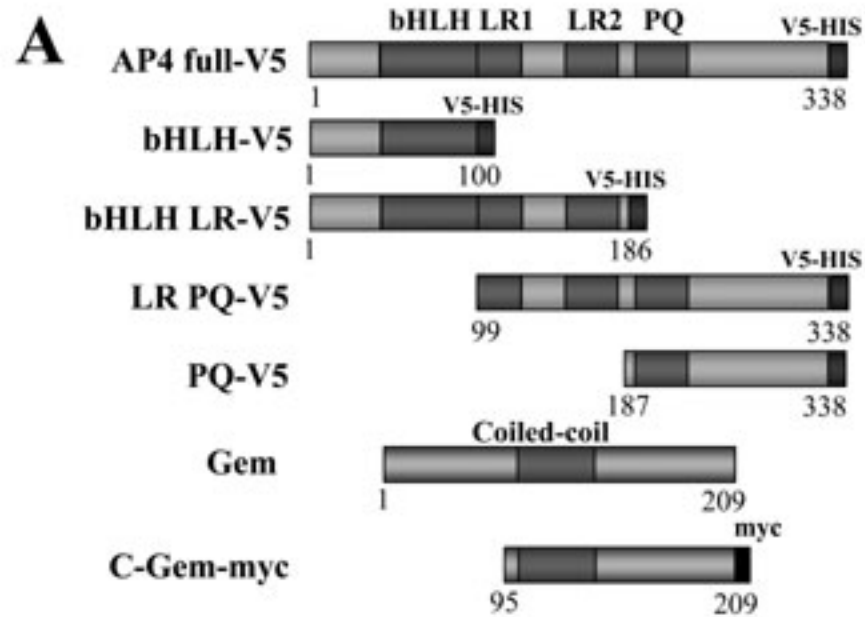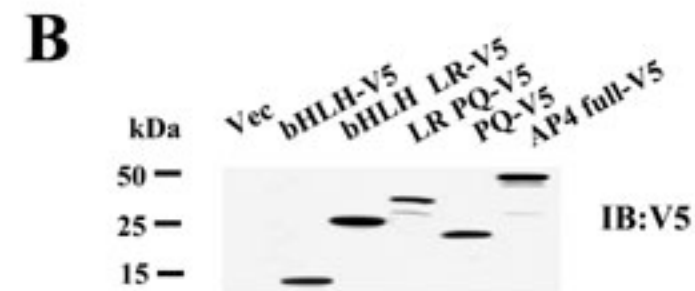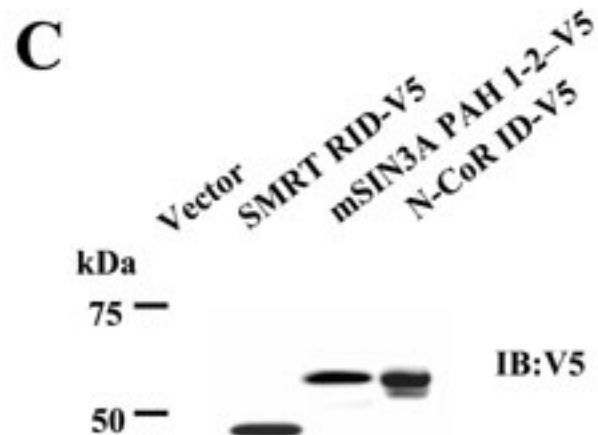

Supplement: pnas_0601915103_3.pdf [file pnas_0601915103_3.pdf]

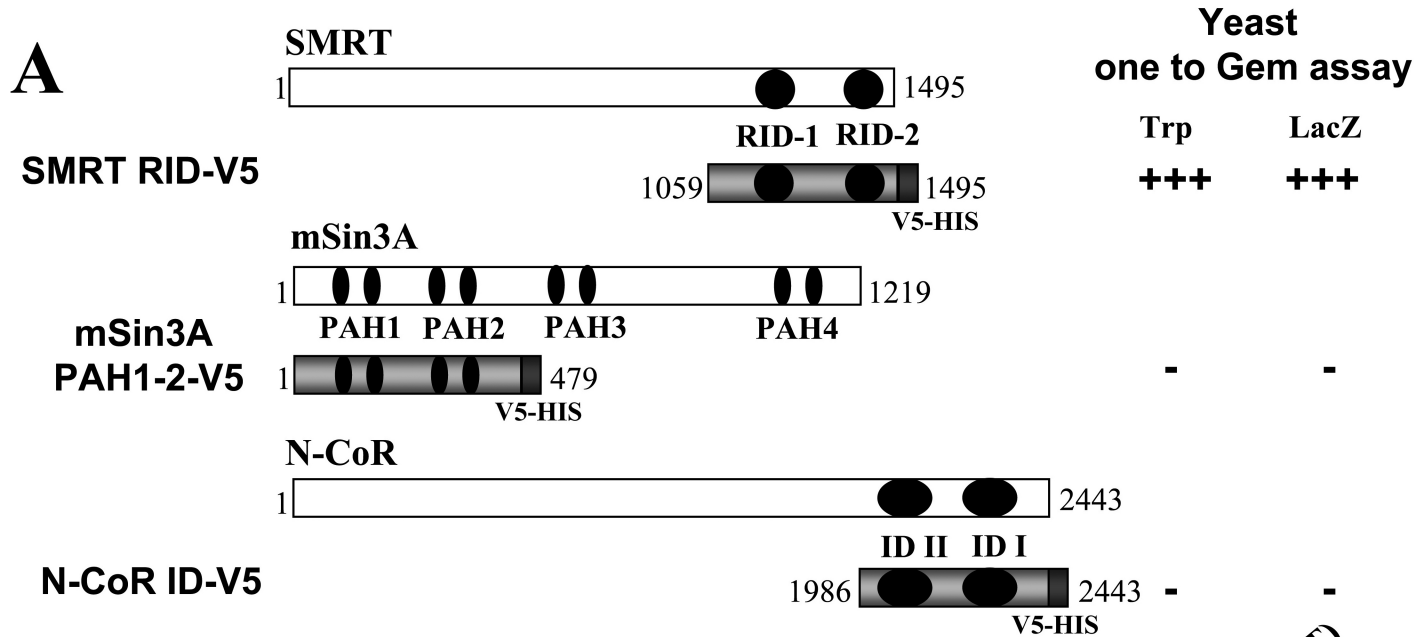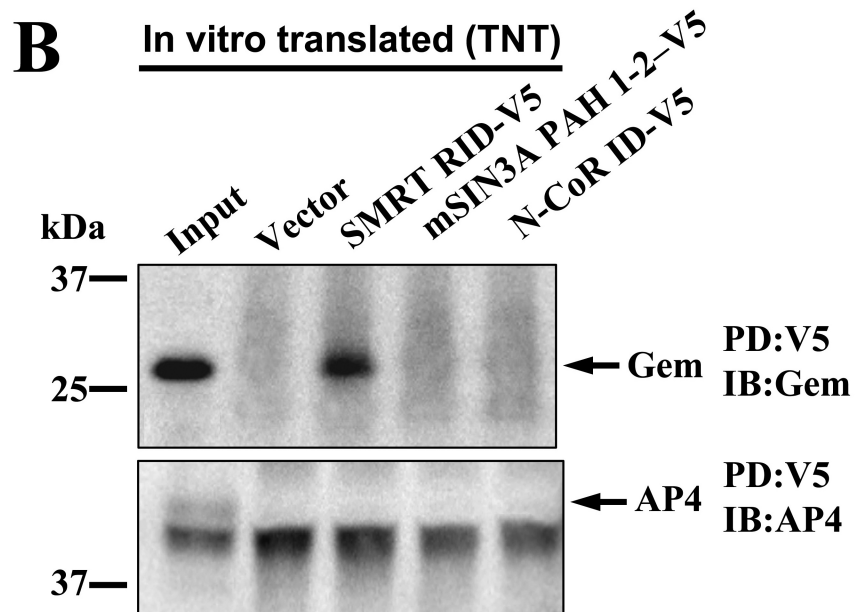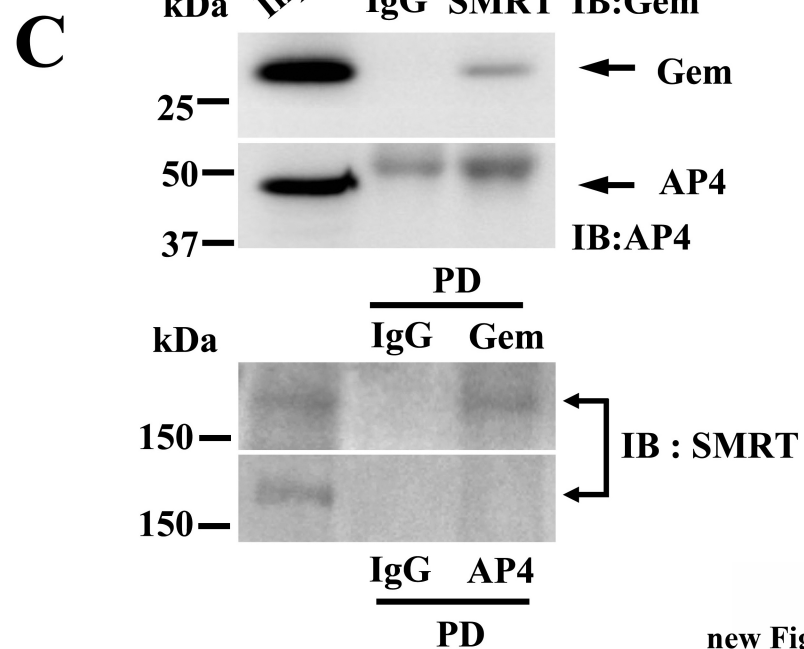

Supplement: pnas_0601915103_4.pdf [file pnas_0601915103_4.pdf]
